# Supplementary material
Source: publisher figshare collection journal article supplement (https://asha.figshare.com/ndownloader/files/24860699)
Supplement: Supplementary file [file 24860699]

## Supplemental Material S1.

**Table S1.**

*Parameters for the Rate of Different Words Model for Males Only*

| Different Words Model Effects                          | Est          | SE            | Model 1<br><i>p</i> < |
|--------------------------------------------------------|--------------|---------------|-----------------------|
| <u>Rate of Different Words Model for the Means</u>     |              |               |                       |
| Intercept                                              | <b>7.978</b> | <b>18.476</b> | <b>.666</b>           |
| Linear Age Slope (0 = 10 years)                        | .363         | 3.234         | .911                  |
| Quadratic Age Slope                                    | <b>-.145</b> | <b>.016</b>   | <b>.001</b>           |
| Leiter IQ (0 = 52)                                     | <b>.269</b>  | <b>.095</b>   | <b>.005</b>           |
| LeiterIQ by Linear                                     | .015         | .018          | .415                  |
| LeiterIQ by Quadratic                                  | -.003        | .002          | .180                  |
| <u>Maternal Commenting Rate Model for the Means</u>    |              |               |                       |
| Intercept (0 = 3.5/min)                                | .569         | .350          | .104                  |
| Linear Age Slope (0 = 10 years)                        | <b>.353</b>  | <b>.050</b>   | <b>.001</b>           |
| Quadratic Age Slope                                    | <b>.013</b>  | <b>.005</b>   | <b>.006</b>           |
| <u>Rate of Different Words Model for the Variance</u>  |              |               |                       |
| Random Intercept Variance                              | 5.631        | 3.629         | .121                  |
| Linear Age Slope Variance                              | .059         | .074          | .425                  |
| Intercept-Age Slope Covariance                         | .575         | .399          | .149                  |
| Residual Variance                                      | <b>7.452</b> | <b>.956</b>   | <b>.001</b>           |
| <u>Maternal Commenting Rate Model for the Variance</u> |              |               |                       |
| Random Intercept Variance                              | <b>.971</b>  | <b>.470</b>   | <b>.039</b>           |
| Linear Age Slope Variance                              | .013         | .008          | .136                  |
| Intercept-Age Slope Covariance                         | .106         | .065          | .104                  |
| Residual Variance                                      | <b>.692</b>  | <b>.136</b>   | <b>.001</b>           |
| <u>Cross-Variable Regressions –</u>                    |              |               |                       |
| Commenting intercept to RDW Intercept                  | .426         | 6.976         | .951                  |
| Commenting age slope to RDW age slope                  | 6.771        | 63.343        | .915                  |
| Commenting intercept to RDW age slope                  | .139         | 1.237         | .911                  |
| Commenting slope to RDW intercept                      | 6.771        | 63.343        | .915                  |
| <u>Within-Dyad</u>                                     |              |               |                       |
| Commenting residual to RDW residual                    | <b>1.118</b> | <b>.480</b>   | <b>.020</b>           |
| <u>Total Effect</u>                                    |              |               |                       |
| Commenting intercept to RDW Intercept                  | 1.544        | 7.169         | .829                  |
| Commenting age slope to RDW age slope                  | .173         | 11.232        | .988                  |

*Note.* This table contains the parameter estimates (Est) for each of the effects in the model as well as the standard error (SE).

The probability of each effect (*p*) is presented with significant values in bold.

**Table S2.**  
*Parameters for the MLU-m Model for Males Only*

| MLU Model Effects                                      | Model 1      |              |             |
|--------------------------------------------------------|--------------|--------------|-------------|
|                                                        | Est          | SE           | p <         |
| <u>MLU Model for the Means</u>                         |              |              |             |
| Intercept                                              | <b>1.810</b> | <b>1.003</b> | <b>.071</b> |
| Linear Age Slope (0 = 10 years)                        | .010         | .075         | .895        |
| Leiter IQ (0 = 52)                                     | <b>.023</b>  | <b>.009</b>  | <b>.014</b> |
| LeiterIQ by Linear                                     | .001         | .001         | .440        |
| <u>Maternal Commenting Rate Model for the Means</u>    |              |              |             |
| Intercept (0 = 3.5)                                    | <b>.806</b>  | <b>.182</b>  | <b>.001</b> |
| Linear Age Slope (0 = 12 years)                        | <b>.355</b>  | <b>.025</b>  | <b>.001</b> |
| Quadratic Age Slope                                    | <b>.012</b>  | <b>.005</b>  | <b>.016</b> |
| <u>MLU Model for the Variance</u>                      |              |              |             |
| Random Intercept Variance                              | <b>.136</b>  | <b>.046</b>  | <b>.003</b> |
| Linear Age Slope Variance                              | .001         | .004         | .962        |
| Intercept-Age Slope Covariance                         | .005         | .008         | .556        |
| Residual Variance                                      | <b>.188</b>  | <b>.025</b>  | <b>.001</b> |
| <u>Maternal Commenting Rate Model for the Variance</u> |              |              |             |
| Random Intercept Variance                              | <b>.710</b>  | <b>.244</b>  | <b>.004</b> |
| Linear Age Slope Variance                              | .008         | .005         | .129        |
| Intercept-Age Slope Covariance                         | <b>.057</b>  | <b>.031</b>  | <b>.066</b> |
| Residual Variance                                      | <b>.845</b>  | <b>.132</b>  | <b>.001</b> |
| <u>Cross-Variable Regressions –</u>                    |              |              |             |
| Commenting intercept to MLU Intercept                  | .202         | .327         | .536        |
| Commenting age slope to MLU age slope                  | .110         | .266         | .678        |
| Commenting intercept to MLU age slope                  | .022         | .028         | .425        |
| Commenting slope to MLU intercept                      | .359         | 3.482        | .918        |
| <u>Within-Dyad</u>                                     |              |              |             |
| Commenting residual to MLU residual                    | -.011        | .041         | .779        |
| <u>Total Effect</u>                                    |              |              |             |
| Commenting intercept to MLU Intercept                  | .191         | .318         | .548        |
| Commenting age slope to MLU age slope                  | .099         | .259         | .702        |

*Note.* This table contains the parameter estimates (Est) for each of the effects in the model as well as the standard error (SE). The probability of each effect (p) is presented with significant values in bold.

**Table S3.**  
*Parameters for the PPVT-IV Model for Males Only*

| PPVT-4 Raw Score Model Effects                         |                | Model 1        |             |
|--------------------------------------------------------|----------------|----------------|-------------|
|                                                        | Est            | SE             | p <         |
| <u>PPVT-4 Model for the Means</u>                      |                |                |             |
| Intercept                                              | <b>72.436</b>  | <b>26.177</b>  | <b>.006</b> |
| Linear Age Slope (0 = 10 years)                        | 2.073          | 4.823          | .667        |
| Leiter IQ (0 = 52)                                     | <b>2.415</b>   | <b>.905</b>    | <b>.008</b> |
| LeiterIQ by Linear                                     | .037           | .086           | .667        |
| <u>Maternal Commenting Rate Model for the Means</u>    |                |                |             |
| Intercept (0 = 3.5)                                    | <b>.703</b>    | <b>.370</b>    | <b>.058</b> |
| Linear Age Slope (0 = 12 years)                        | <b>.392</b>    | <b>.073</b>    | <b>.001</b> |
| <u>PPVT-4 Model for the Variance</u>                   |                |                |             |
| Random Intercept Variance                              | <b>341.127</b> | <b>179.807</b> | <b>.058</b> |
| Linear Age Slope Variance                              | .255           | 6.740          | .970        |
| Intercept-Age Slope Covariance                         | 8.435          | 17.059         | .621        |
| Residual Variance                                      | <b>161.134</b> | <b>36.241</b>  | <b>.001</b> |
| <u>Maternal Commenting Rate Model for the Variance</u> |                |                |             |
| Random Intercept Variance                              | 1.189          | .841           | .158        |
| Linear Age Slope Variance                              | .019           | .012           | .118        |
| Intercept-Age Slope Covariance                         | -.001          | .068           | .990        |
| Residual Variance                                      | <b>.759</b>    | <b>.326</b>    | <b>.020</b> |
| <u>Cross-Variable Regressions –</u>                    |                |                |             |
| Commenting intercept to PPVT-4 Intercept               | 1.560          | 8.932          | .861        |
| Commenting age slope to PPVT-4 age slope               | -1.739         | 15.150         | .909        |
| Commenting intercept to PPVT-4 age slope               | 1.089          | 1.509          | .471        |
| Commenting slope to PPVT-4 intercept                   | 17.449         | 60.790         | .774        |
| <u>Within-Dyad</u>                                     |                |                |             |
| Commenting residual to PPVT-4 residual                 | .262           | 3.179          | .934        |
| <u>Total Effect</u>                                    |                |                |             |
| Commenting intercept to PPVT-4 Intercept               | 1.822          | 7.230          | .801        |
| Commenting age slope to PPVT-4 age slope               | -1.477         | 13.645         | .914        |

*Note.* This table contains the parameter estimates (Est) for each of the effects in the model as well as the standard error (SE). The probability of each effect (p) is presented with significant values in bold.

**Table S4.**  
*EVT-2 Model Parameters for Males Only*

| EVT-2 Raw Score Model Effects                          |                | Model 1        |             |
|--------------------------------------------------------|----------------|----------------|-------------|
|                                                        | Est            | SE             | p <         |
| <u>EVT-2 Model for the Means</u>                       |                |                |             |
| Intercept                                              | 47.845         | 39.840         | .230        |
| Linear Age Slope (0 = 10 years)                        | 1.101          | 2.963          | .710        |
| Leiter IQ (0 = 52)                                     | <b>2.045</b>   | <b>.606</b>    | <b>.001</b> |
| LeiterIQ by Linear                                     | .042           | .067           | .535        |
| <u>Maternal Commenting Rate Model for the Means</u>    |                |                |             |
| Intercept (0 = 3.5)                                    | <b>.880</b>    | <b>.369</b>    | <b>.017</b> |
| Linear Age Slope (0 = 12 years)                        | <b>.412</b>    | <b>.093</b>    | <b>.001</b> |
| <u>EVT Model for the Variance</u>                      |                |                |             |
| Random Intercept Variance                              | <b>209.653</b> | <b>103.757</b> | <b>.043</b> |
| Linear Age Slope Variance                              | .270           | 1.733          | .876        |
| Intercept-Age Slope Covariance                         | 5.122          | 8.443          | .544        |
| Residual Variance                                      | <b>34.682</b>  | <b>15.824</b>  | <b>.028</b> |
| <u>Maternal Commenting Rate Model for the Variance</u> |                |                |             |
| Random Intercept Variance                              | .988           | .618           | .110        |
| Linear Age Slope Variance                              | .015           | .019           | .442        |
| Intercept-Age Slope Covariance                         | -.036          | .134           | .790        |
| Residual Variance                                      | <b>.851</b>    | <b>.382</b>    | <b>.026</b> |
| <u>Cross-Variable Regressions –</u>                    |                |                |             |
| Commenting intercept to EVT-2 Intercept                | 1.624          | 8.886          | .855        |
| Commenting age slope to EVT-2 age slope                | 1.842          | 6.964          | .791        |
| Commenting intercept to EVT-2 age slope                | .251           | .667           | .706        |
| Commenting slope to EVT-2 intercept                    | 26.366         | 81.066         | .745        |
| Within-Dyad                                            |                |                |             |
| Commenting residual to EVT-2 residual                  | .830           | 1.491          | .578        |
| Total Effect                                           |                |                |             |
| Commenting intercept to EVT-2 Intercept                | 2.454          | 8.988          | .785        |
| Commenting age slope to EVT-2 age slope                | 2.671          | 6.363          | .675        |

*Note.* This table contains the parameter estimates (Est) for each of the effects in the model as well as the standard error (SE). The probability of each effect (p) is presented with significant values in bold.
